# Supplementary material
Source: PubMed Central journal article supplement (PMC3989356)
Supplement: chan-7-275-s01.pdf [file chan-7-275-s01.pdf]

## **Supplemental Material to:**

**Yoon Sun Chun, Hyun Geun Oh, Myoung Kyu Park, Hana  
Cho and Sungkwon Chung**

**Cholesterol regulates HERG K<sup>+</sup> channel activation by  
increasing phospholipase C  $\beta$ 1 expression**

**July/August 2013; Vol 7 (Issue 4)**

**<http://dx.doi.org/10.4161/chan.25122>**

**<http://www.landesbioscience.com/journals/channels/article/25122/>**

**Supplemental Fig. 1**

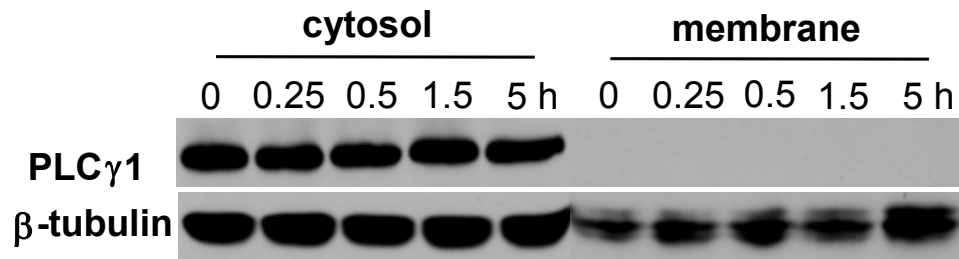

Supplemental Figure 1: The mild cholesterol enrichment did not alter the expression level of PLCγ1. HERG-transfected HEK293 cells were incubated with 25 μM MβCD-cholesterol for 0.25, 0.5, 1.5, and 5 h. Membrane and cytosol fractions were obtained as described in Materials and Methods, and monoclonal mouse antibody against PLCγ1 was used. Similar results were obtained from 3 different experiments. PLCγ1 expression was not changed by cholesterol in cytosol fraction. PLCγ1 expression was not observed in membrane fraction.

**Supplemental Fig. 2**

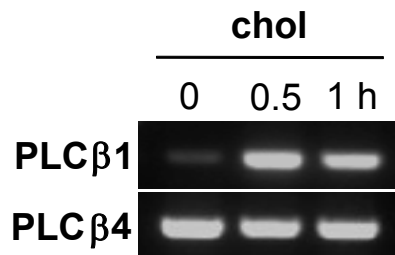

Supplemental Figure 2: The mild cholesterol enrichment increased the expression of PLCβ1 mRNA in HERG-transfected HEK293 cells. HERG-transfected HEK293 cells were incubated with 25 μM MβCD-cholesterol for 0.5 and 1 h, which was followed by isolating RNA as described in Materials and Methods. The expressions of both PLCβ1 and PLCβ4 mRNA were analyzed by RT-PCR. Similar results were obtained from 3 different experiments. The expression of PLCβ1 mRNA, but not that of PLCβ4 mRNA, was increased by cholesterol.

### Supplemental Fig. 3

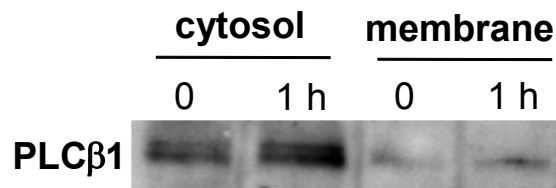

Supplemental Figure 3: The mild cholesterol enrichment increased PLC $\beta$ 1 expressions from myocytes. Adult mouse ventricular myocytes was isolated as described previously (Ref. 21). Cells were incubated with 25  $\mu$ M M $\beta$ CD-cholesterol for 1 h, and membrane and cytosol fractions were obtained as described in Materials and Methods. PLC $\beta$ 1 expression was increased by cholesterol from both cytosol and membrane fractions. Similar results were obtained from 3 different experiments.
